# Supplementary material for: Structural Quantification of the Surface-Confined Metal-Organic Precursors Simulated with the Lattice Monte Carlo Method
Source: MDPI journal article supplement (doi:10.3390/molecules28104253), 2023-05-22
Supplement: s1 [file s1]

## Supplementary Materials

for

Structural Quantification of the Surface-Confined Metal-Organic Precursors Simulated with  
the Lattice Monte Carlo Method

Jakub Lisiecki and Paweł Szabelski\*

*Department of Theoretical Chemistry, Institute of Chemical Sciences, Faculty of Chemistry,  
Maria Curie-Skłodowska University in Lublin,  
Pl. M.C. Skłodowskiej 3, 20-031 Lublin, Poland*

### Order parameter

The parameter of order was calculated using the following equation:

$$\delta = \frac{|N_{l1} - N_{l2}| + |N_{l2} - N_{l3}| + |N_{l1} - N_{l3}|}{2 * N_l} \quad (\text{Equation S1})$$

where  $N_l$  is the total number of linkers in the system and  $N_{l1}$ ,  $N_{l2}$ ,  $N_{l3}$  are the average numbers of linkers oriented along the 3 main directions defined by the sections connecting two first segments of a molecule: that is the segment with the lowest locant and its nearest segment. Note that, for linear backbones (acenes) the parameter  $\delta$  refers simply to the orientation of the long axis of a given molecule, while for bent molecules it describes orientation of the 2-membered fragment of their backbones. As in Equation (S1) every linker in the pair is counted twice, the result is divided by 2.

## Radial function distribution

The metal-metal radial distribution function was calculated using the following formula:

$$g(r) = \frac{\langle n_r \rangle A}{N_m \pi (2rdr + dr^2)} \quad (\text{Equation S2})$$

where  $\langle n_r \rangle$  is the average number of metal atoms in  $(r, r + dr)$  shell away from any given metal,  $\pi(2rdr + dr^2)$  is the area of the considered shell ( $dr = 0.05$ ), and  $A$  denotes the Cartesian area of the system ( $A = L^2 * \frac{\sqrt{3}}{2}$ ).

## 1D and 2D structure factors

The one-dimensional structure factor was calculated using the following formula:

$$S(q) = \frac{\sum_{i=1}^{N_m} 2 \sin(|q| * |r_i|)}{N_m} + 1 \quad (\text{Equation S3})$$

where  $|r_i|$  denotes the distance between  $i$ -th pair of metal atoms and  $|q|$  is the scattering vector length ( $|q| = a2\pi/L$ , where  $a = 1, 2, 3 \dots q_{max} // q$ ).

The two-dimensional structure factor was calculated using the following formula:

$$S_{2D}(q) = \frac{\left( \sum_{i=1}^{N_m} \sin(q \cdot r_i) \right)^2 + \left( \sum_{i=1}^{N_m} \cos(q \cdot r_i) \right)^2}{N_m} \quad (\text{Equation S4})$$

where  $r_i$  denotes the distance vector between  $i$ - pair of metal atoms, and  $q$  is the scattering vector ( $q_x, q_y = a2\pi/L$ , where  $a = q_{max} // 2q \dots -1, 0, 1 \dots q_{max} // 2q$ ).

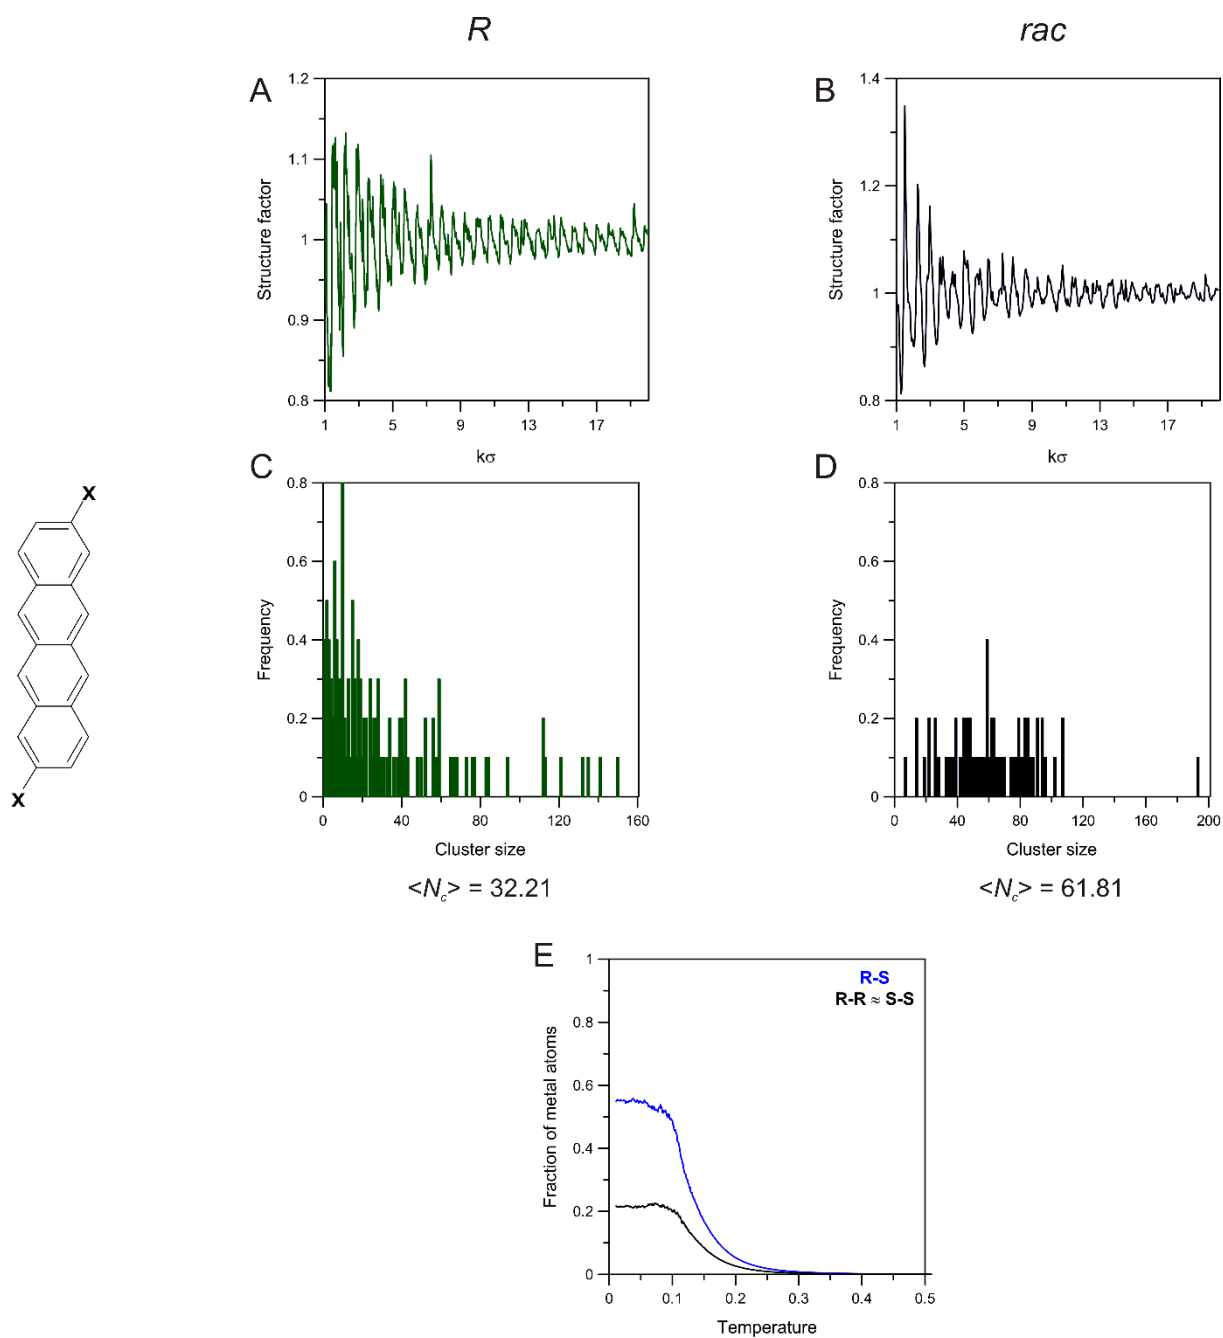

**Figure S1.** Structure factors (A, B), frequency of clusters of a given size and average size of the cluster (C, D) and fractions of homo- and heterochirally bonded metal atoms (E) for enantiopure (A, C) and racemic (B, D, E) systems of **t28** depicted in Figure 1.

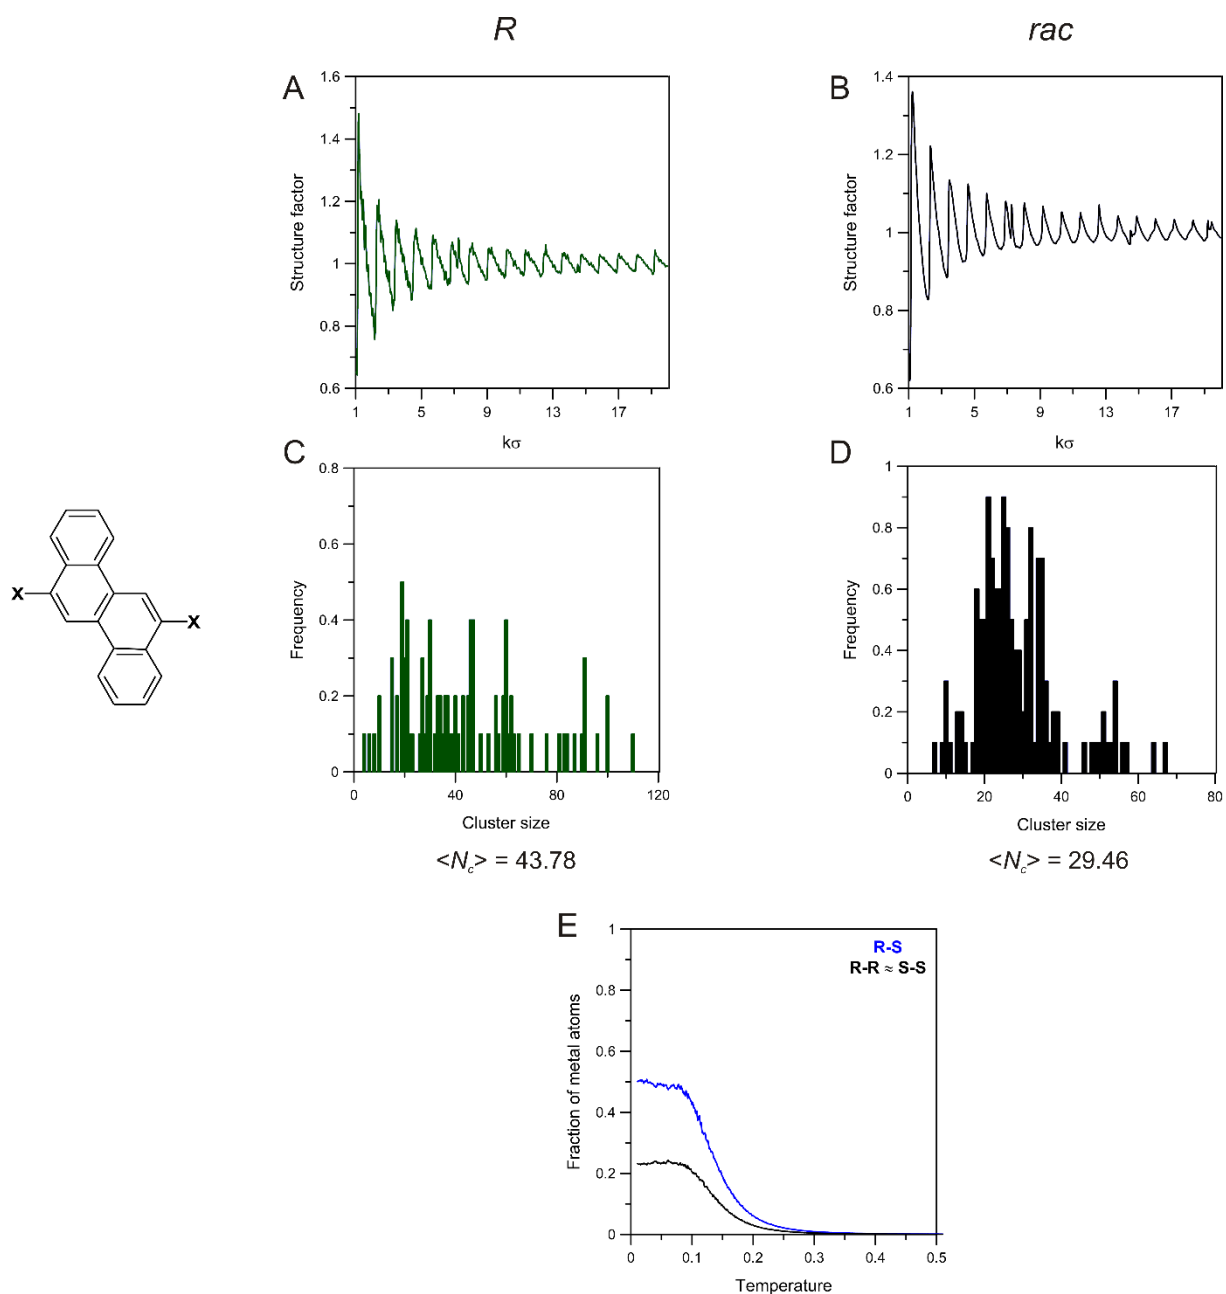

**Figure S2.** Structure factors (A, B), frequency of clusters of a given size and average size of the cluster (C, D) and fractions of homo- and heterochirally bonded metal atoms (E) for enantiopure (A, C) and racemic (B, D, E) systems of **c28** depicted in Figure 2.

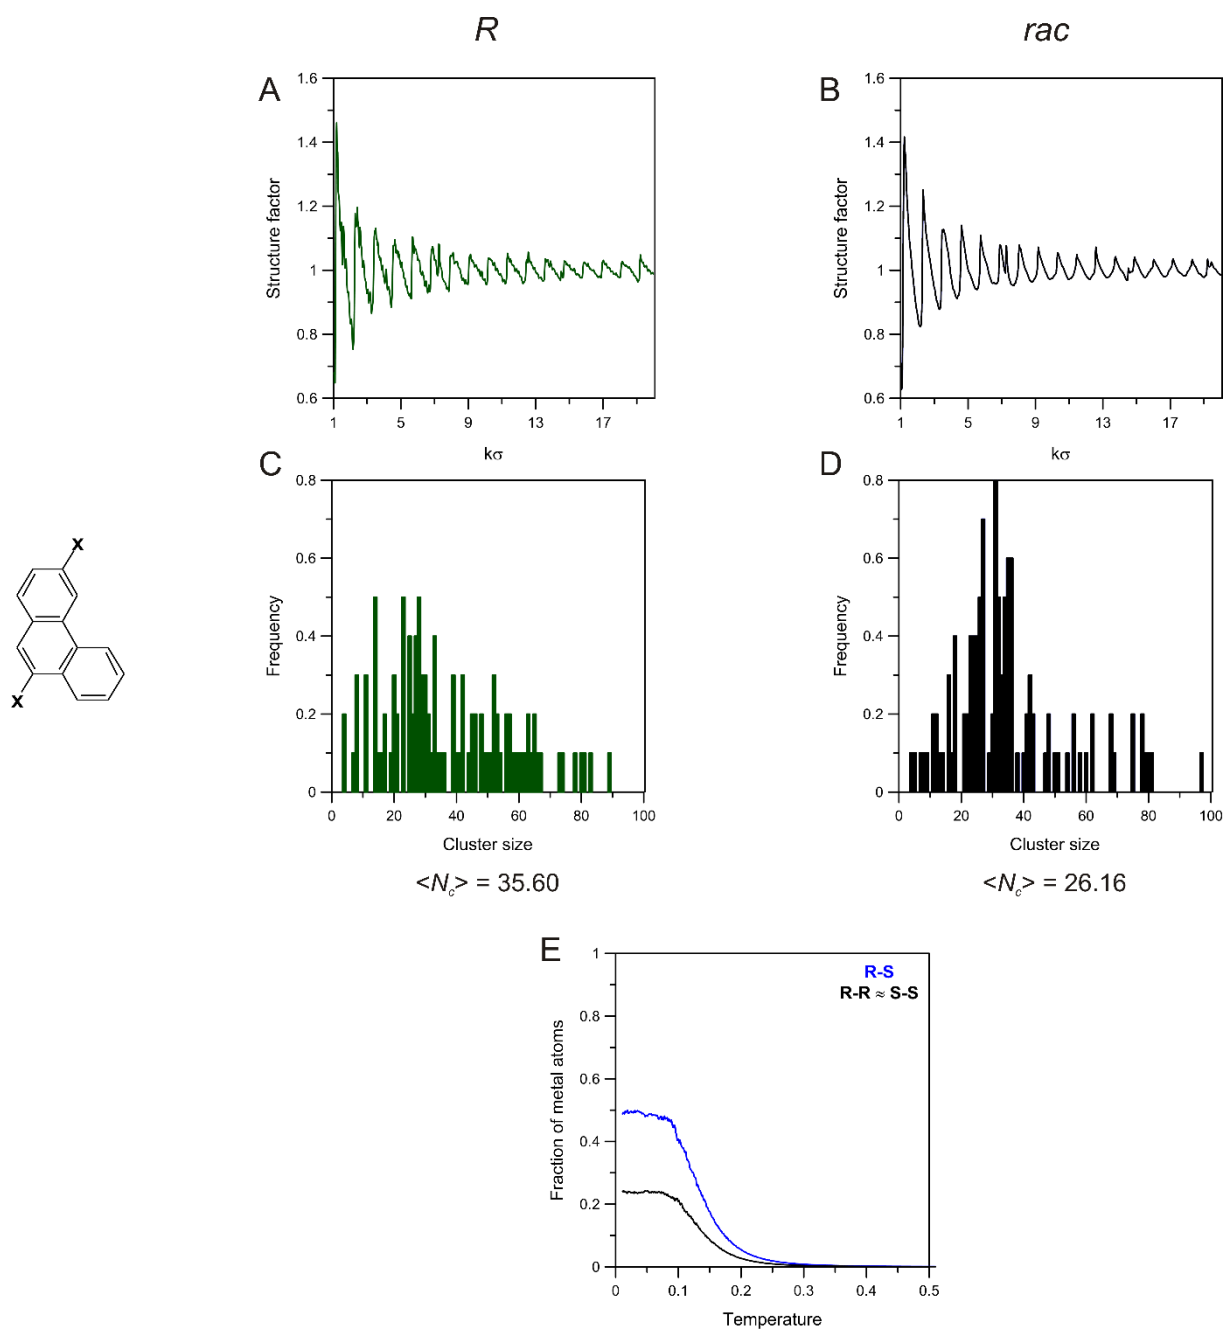

**Figure S3.** Structure factors (A, B), frequency of clusters of a given size and average size of the cluster (C, D) and fractions of homo- and heterochirally bonded metal atoms (E) for enantiopure (A, C) and racemic (B, D, E) systems of **p39** depicted in Figure 3.

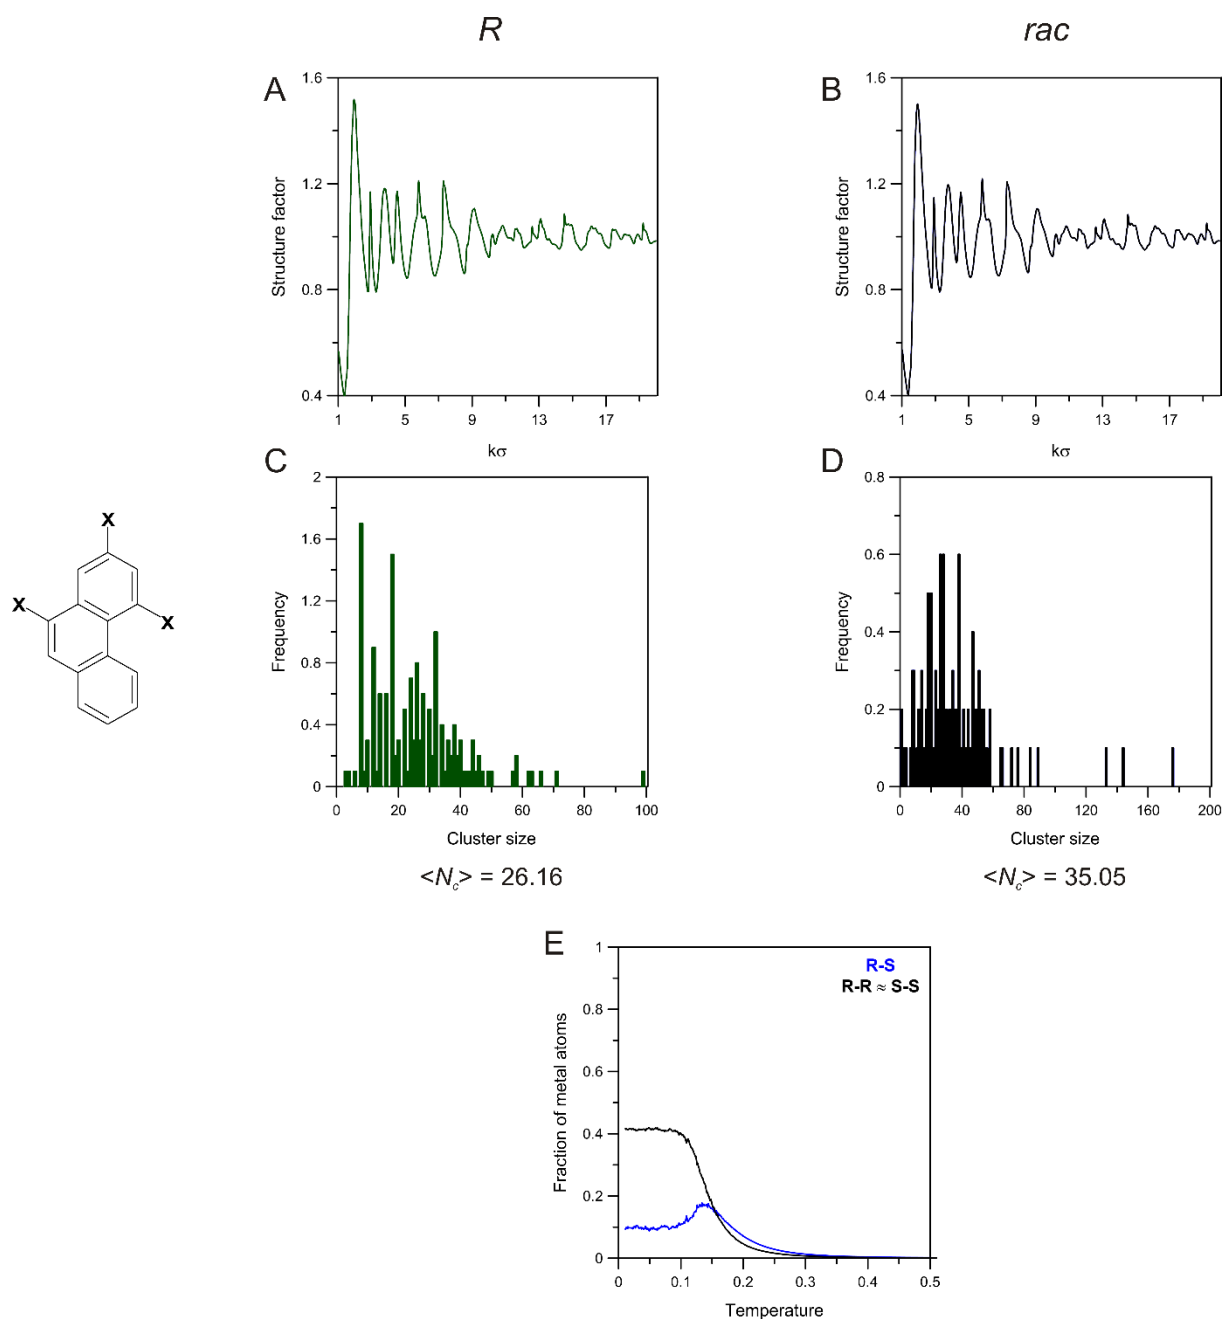

**Figure S4.** Structure factors (A, B), frequency of clusters of a given size and average size of the cluster (C, D) and fractions of homo- and heterochirally bonded metal atoms (E) for enantiopure (A, C) and racemic (B, D, E) systems of **p24\_10** depicted in Figure 4.

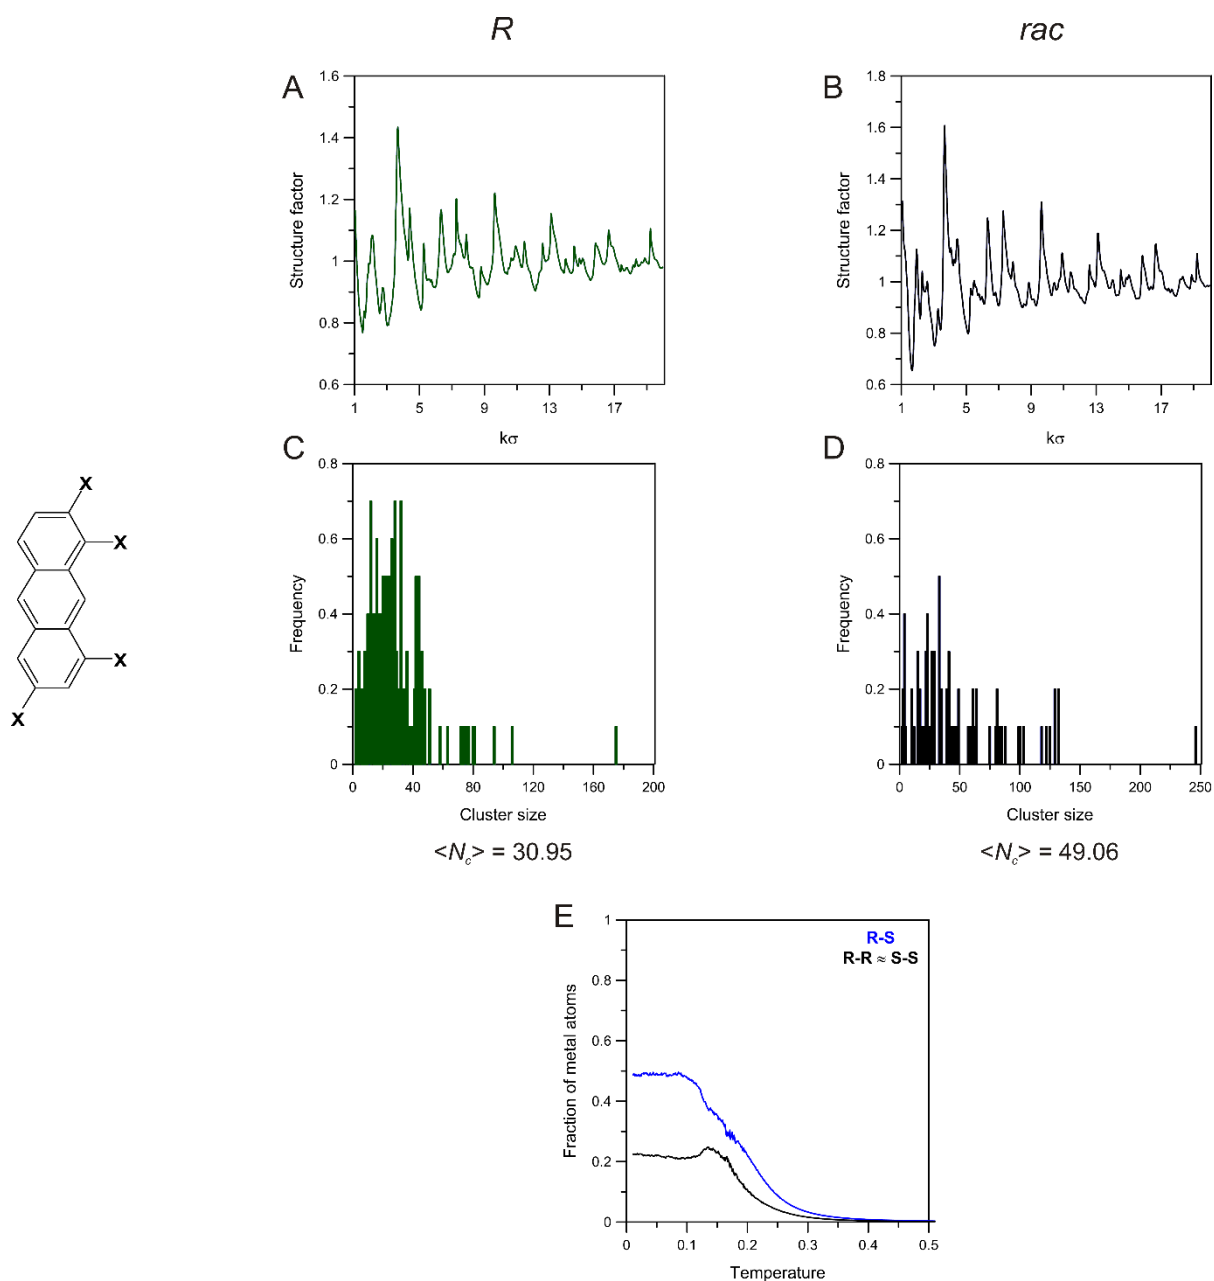

**Figure S5.** Structure factors (A, B), frequency of clusters of a given size and average size of the cluster (C, D) and fractions of homo- and heterochirally bonded metal atoms (E) for enantiopure (A, C) and racemic (B, D, E) systems of **a1268** depicted in Figure 5.

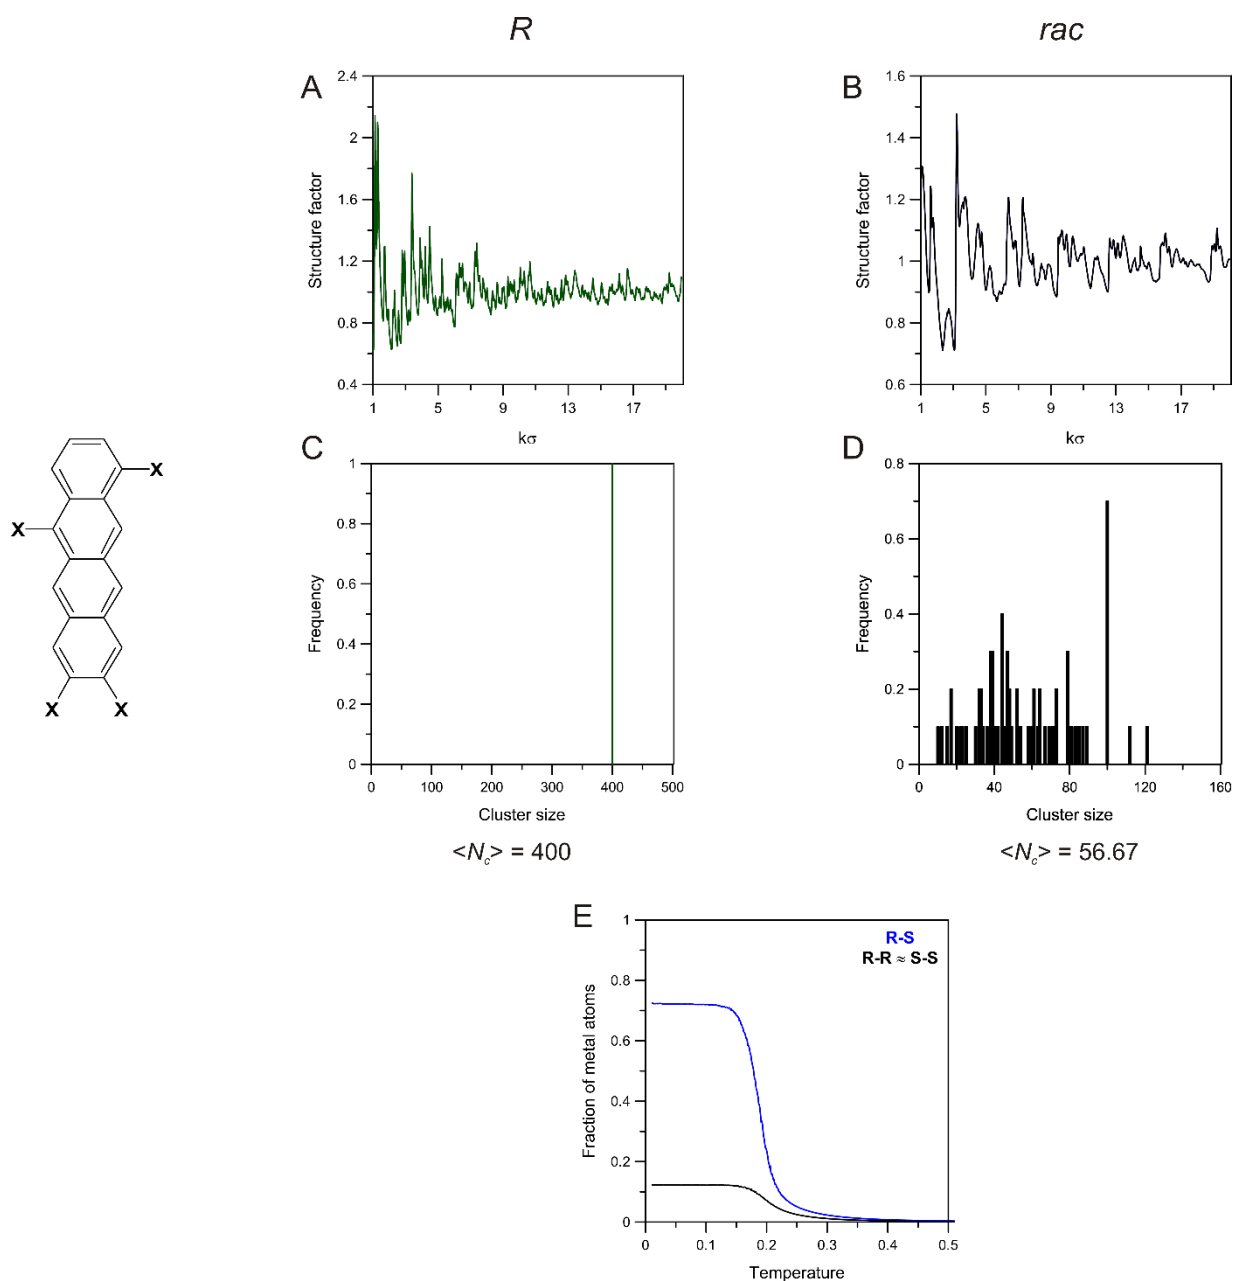

**Figure S6.** Structure factors (A, B), frequency of clusters of a given size and average size of the cluster (C, D) and fractions of homo- and heterochirally bonded metal atoms (E) for enantiopure (A, C) and racemic (B, D, E) systems of **t1589** depicted in Figure 6.
